# Supplementary material
Source: MDPI journal article supplement (https://www.mdpi.com/2077-1312/10/10/1416)
Supplement: s1 [file s1]

Archive with 5 entries (5 files):
- Supplementary Materials.pdf
- Video S1 Minimum start-up speed test of the B-TENG in Version 4.0.mp4
- Video S2 Effects of PM on the output performance of the B-TENG.mp4
- Video S3 Heating process of the B-TENG in the heating box at 180 íπC for 10 minutes.mp4
- Video S4 Demonstration of the B-TENG as the gas flow sensor.mp4
